# Supplementary material for: The effect of pallidal stimulation on sleep outcomes and related brain connectometries in Parkinson’s disease
Source: PubMed Central journal article supplement — NPJ Parkinsons Dis. 2024 Nov 4;10:212. doi: 10.1038/s41531-024-00800-4 (PMC11535399; doi:10.1038/s41531-024-00800-4), 2024-11-04
Supplement: 41531_2024_800_MOESM1_ESM.pdf [file 41531_2024_800_MOESM1_ESM.pdf]

## Supplementary Files

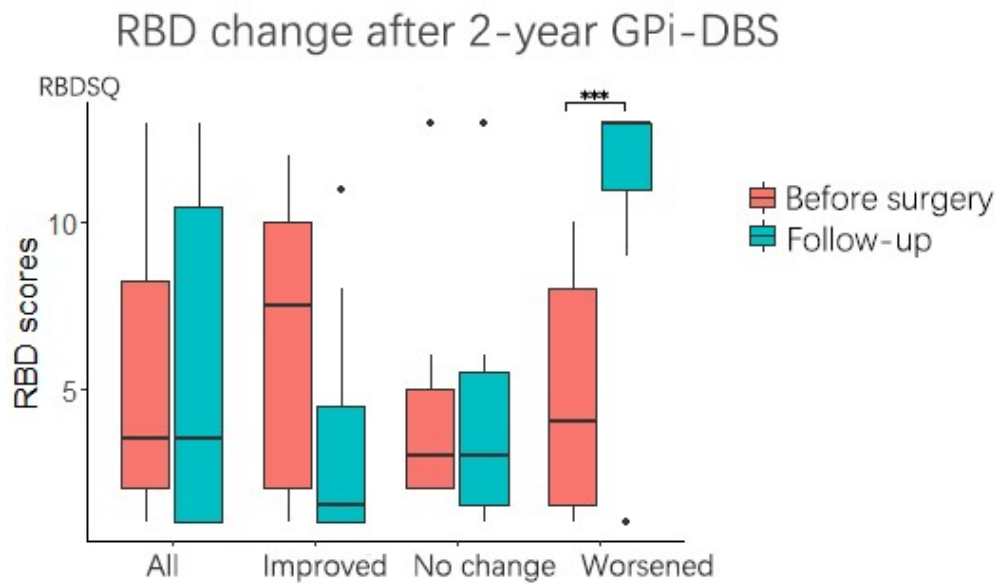

**Supplementary Figure 1.** Boxplots compare RBDSQ score between before surgery and at follow ups in all patients and three MID-divided subgroups. The lower and upper boundaries of a box plot represent the 25th and 75th percentiles, respectively. The median is represented by the centerline. The whisker lines extend to the smallest and largest non-outlier data points (interquartile range multiplied by 1.5). Significant P-values after Bonferroni correction are indicated. \*\*P < 0.01, \*P < 0.05, signed-rank test. \*p<0.05, \*\*p<0.01, \*\*\*p<0.001

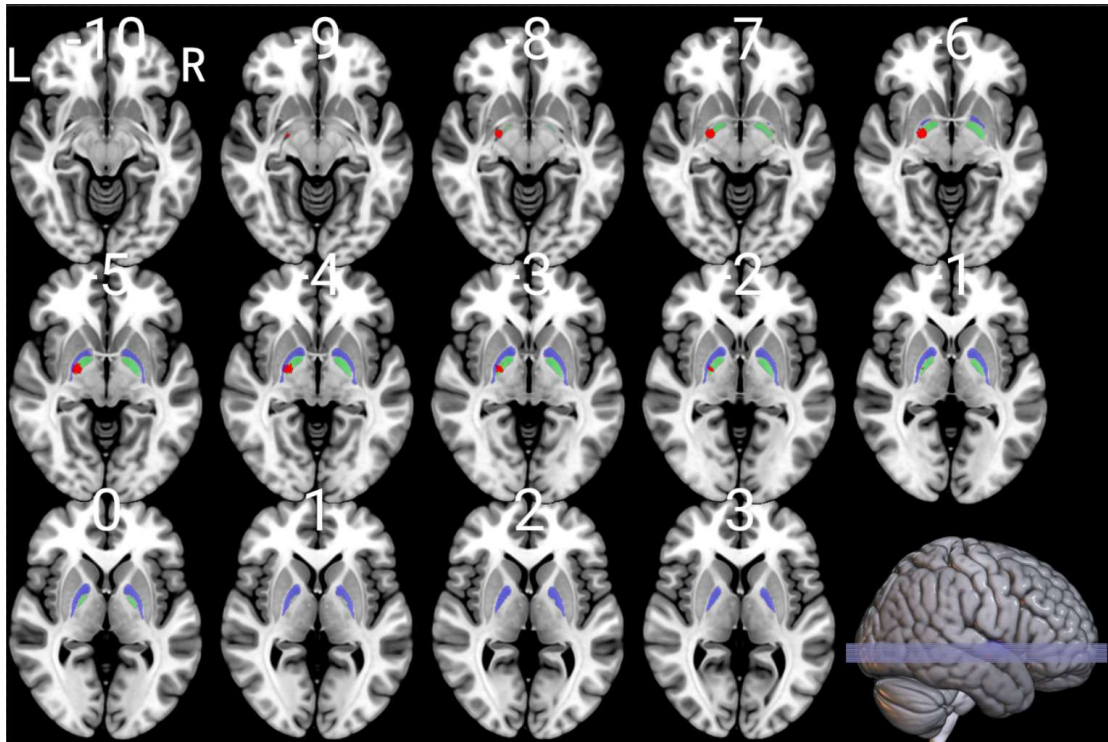

**Supplementary Figure 2.** Axial view of sweetspot, Globus pallidus internus, and Globus pallidus externus. In a  $0.22 \times 0.22 \times 0.22$  mm space, the number of voxels of the sweetspot was 22104 ( $235.36 \text{ mm}^3$ ). There were 756 voxels ( $8.05 \text{ mm}^3$ ) in GPe and 14875 voxels in GPi ( $158.39 \text{ mm}^3$ ). There were 2378 voxels ( $25.32 \text{ mm}^3$ ) within 1mm out of GPi border and 356 voxels ( $3.79 \text{ mm}^3$ ) within 1mm out of GPe border.

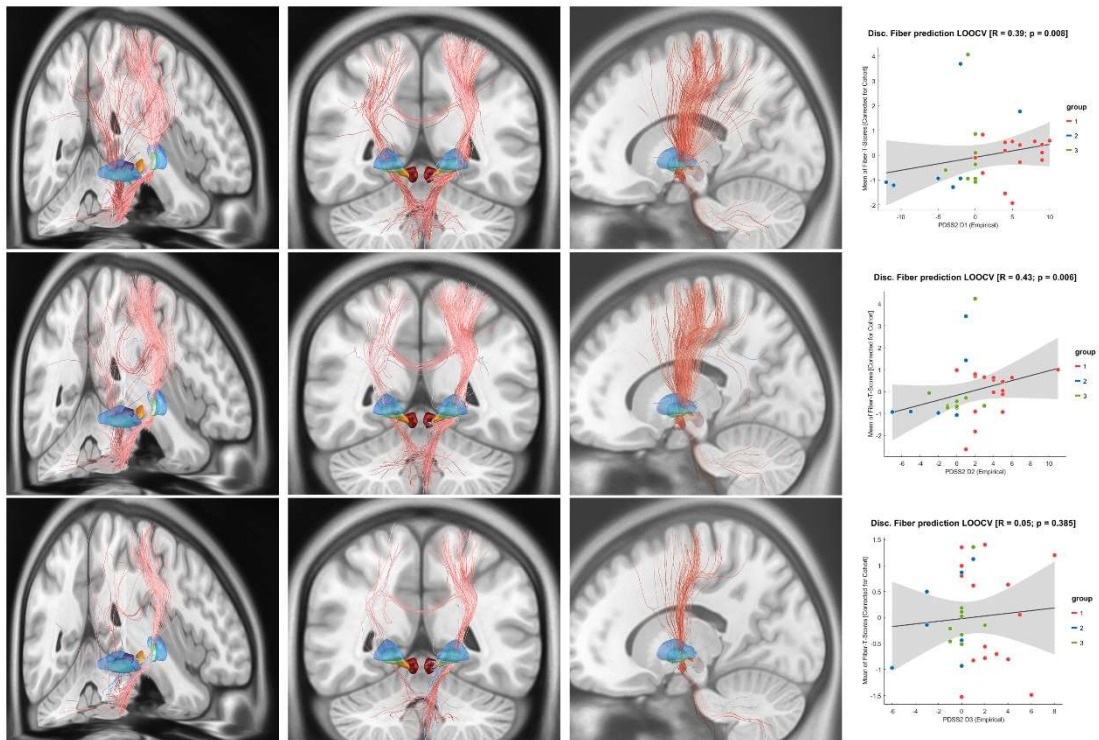

**Supplementary Figure 3.** Connectome correlated with improvement and worsening of the three subdomains of PDSS-2 score. Fibers in red were correlated with improvement and in blue were the worsened. The illustrated fibers were not FDR-corrected because no fibers passed FDR-correction in “PD symptoms at night” analysis. Fibers were thresholded with top 30% T-score.

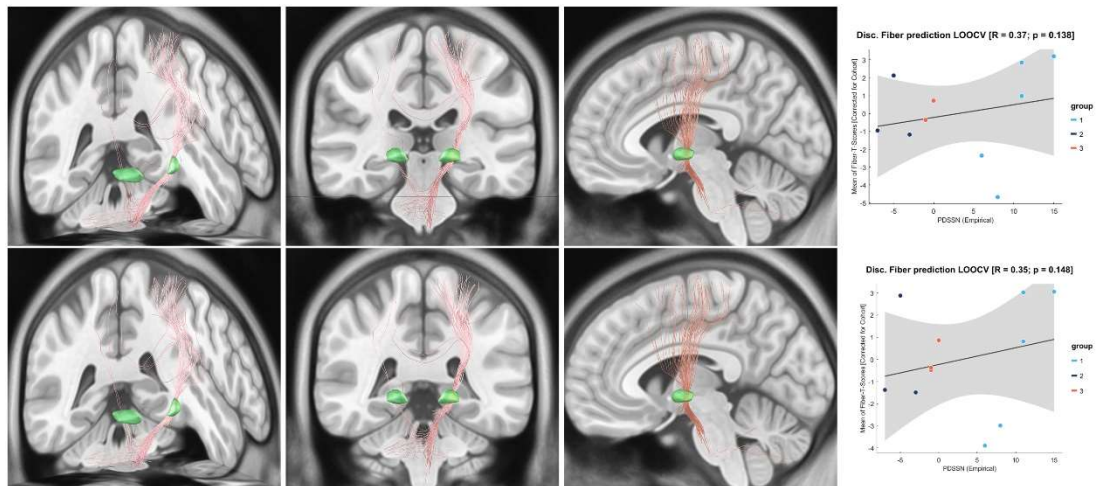

**Supplementary Figure 4.** We conducted a linear regression to see if UPDRS-III improvement was correlated with PDSS-2 improvement in 11 patients with follow-up UPDRS-III score. We found the  $t$  value was 0.01304 and  $p$  value was 0.927. Then they were selected to construct the connectome correlated to PDSS-2 score change. Upper row showed connectome with no covariates added; lower row showed UPDRS-III added as the covariate. The illustrated fibers were FDR-corrected with  $p$ -value  $< 0.05$ . Fibers were thresholded with top 30% T-score. The overall connections were seemingly the same with or without the covariate.

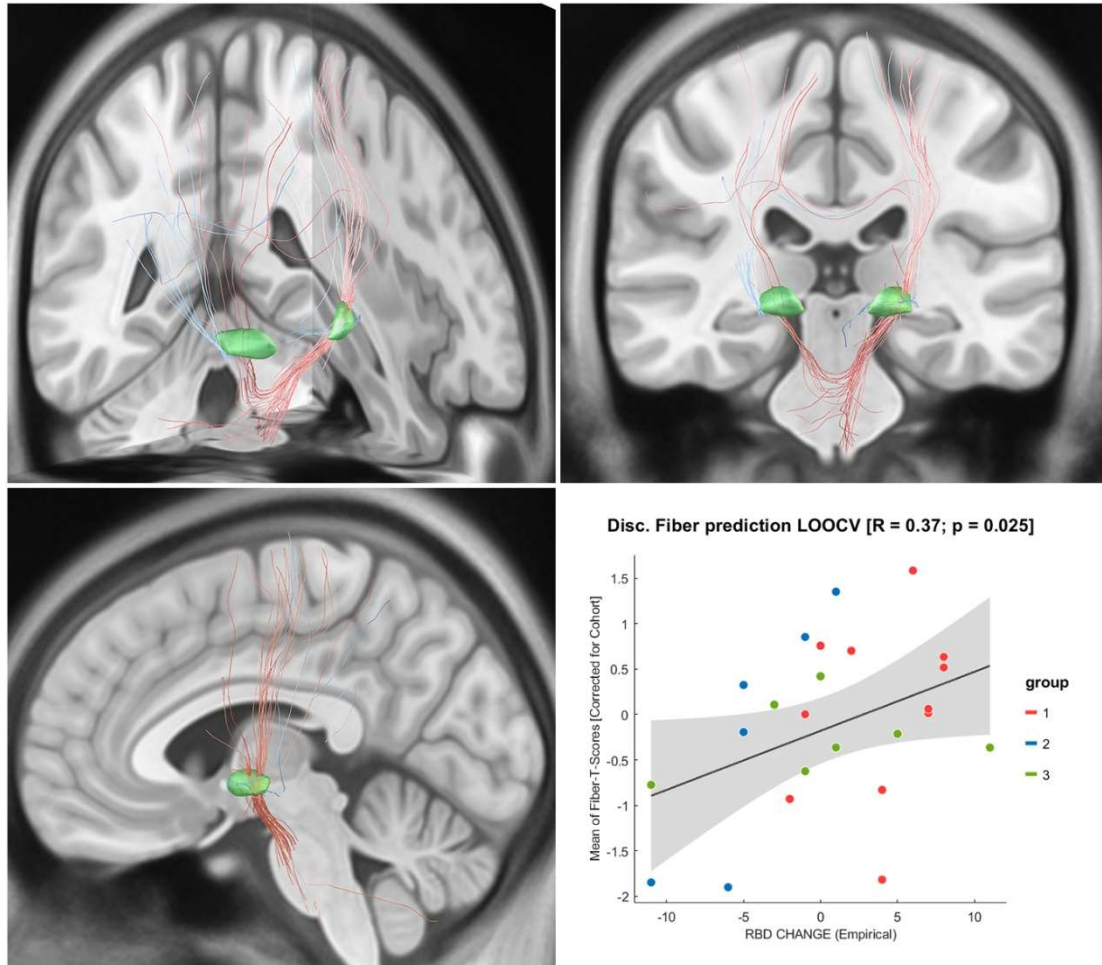

**Supplementary Figure 5.** Connectome correlated with improvement and worsening of RBDSQ score in 26 patients. The illustrated fibers were not FDR-corrected because no fibers passed FDR-correction. Fibers were thresholded with top 30% T-score. There were 51 positive fibers and 4 negative fibers from left GPi and 9 negative fibers from right GPi.

**Supplementary Table 1.** Demographic of patients receiving GPi-DBS and STN-DBS

|                       | GPi-DBS |        | STN-DBS |        | T test |
|-----------------------|---------|--------|---------|--------|--------|
|                       | mean    | sd     | mean    | sd     | p      |
| Numer of Patients(N)  | 32      |        | 32      |        | 1      |
| Age                   | 62.03   | 9.39   | 63.22   | 8.77   | 0.64   |
| Ratio of male         | 0.38    | 0.48   | 0.38    | 0.48   | 1.00   |
| Follow-up Years       | 1.67    | 1.02   | 1.59    | 1.11   | 0.64   |
| LEDD                  | 810.68  | 406.48 | 781.35  | 291.45 | 0.77   |
| MDS-UPDRS III(off)    | 47.72   | 20.98  | 45.53   | 13.30  | 0.70   |
| MDS-UPDRS III(on)     | 20.75   | 13.47  | 20.28   | 9.62   | 0.63   |
| HAMA                  | 15.84   | 6.34   | 14.59   | 8.46   | 0.51   |
| HAMD                  | 16.72   | 8.24   | 15.94   | 7.75   | 0.70   |
| PDQ39                 | 57.81   | 23.11  | 59.81   | 18.87  | 0.71   |
| ASP SCOPA AUT         | 23.19   | 9.67   | 22.44   | 10.34  | 0.85   |
| <b>Sleep results</b>  |         |        |         |        |        |
| PDSS-2 before surgery | 18.38   | 8.18   | 18.81   | 5.35   | 0.80   |
| RBD before surgery    | 5.28    | 4.00   | 5.50    | 3.46   | 0.89   |

MDS-UPDRS, Movement disorder society-unified Parkinson's Disease Rating Scale; IRLS, Index of Restless Legs Syndrome; HAMA, Hamilton Anxiety Scale; HAMD, Hamilton Depression Scale; PDQ-39, Parkinson's Disease Quality of Life-39 items; SCOPA-AUT, the scale for outcomes in PD for autonomic symptoms.

**Supplementary Table 2.** demographics of 11 patients with motor assessment vs. the whole cohort

|                               | Sub-cohort (11) |        | entire cohort |        | Anova |
|-------------------------------|-----------------|--------|---------------|--------|-------|
|                               | mean            | sd     | mean          | sd     | p     |
| Numer of Patients(N)          | 11              |        | 32            |        |       |
| Age                           | 58.32           | 9.50   | 62.03         | 9.39   | 0.27  |
| sex (M:F)                     | 0.45            | 0.50   | 0.38          | 0.48   | 0.65  |
| Follow-up Years               | 1.50            | 0.92   | 10.74         | 3.76   | 0.98  |
| LEDD                          | 885.61          | 390.90 | 810.68        | 406.48 | 0.60  |
| MDS-UPDRS III(off)            | 49.27           | 20.98  | 47.72         | 21.31  | 0.84  |
| MDS-UPDRS III(on)             | 26.45           | 16.38  | 21.42         | 13.37  | 0.33  |
| HAMA                          | 14.27           | 7.14   | 15.84         | 6.34   | 0.51  |
| HAMD                          | 15.64           | 9.58   | 16.72         | 8.24   | 0.73  |
| PDQ39                         | 53.55           | 20.73  | 57.81         | 23.11  | 0.60  |
| ASP SCOPA AUT                 | 19.36           | 8.65   | 23.19         | 9.67   | 0.26  |
| PDSS-2                        | 15.73           | 5.69   | 18.38         | 8.18   | 0.34  |
| <b>stimulation parameters</b> |                 |        |               |        |       |
| pulse width                   | 79.09           | 13.79  | 79.69         | 15.29  | 0.91  |
| frequency                     | 128.64          | 20.68  | 132.66        | 19.59  | 0.57  |
| voltage                       | 2.51            | 0.65   | 2.62          | 0.78   | 0.67  |

MDS-UPDRS, Movement disorder society-unified Parkinson's Disease Rating Scale; IRLS, Index of Restless Legs Syndrome; HAMA, Hamilton Anxiety Scale; HAMD, Hamilton Depression Scale; PDQ-39, Parkinson's Disease Quality of Life-39 items; SCOPA-AUT, the scale for outcomes in PD for autonomic symptoms.
